# Supplementary material
Source: PubMed Central journal article supplement (PMC6091891)
Supplement: NIHMS932928-supplement.pdf [file NIHMS932928-supplement.pdf]

**Figure S1 (related to Figures 2 and 3)**

**A dIPFC**

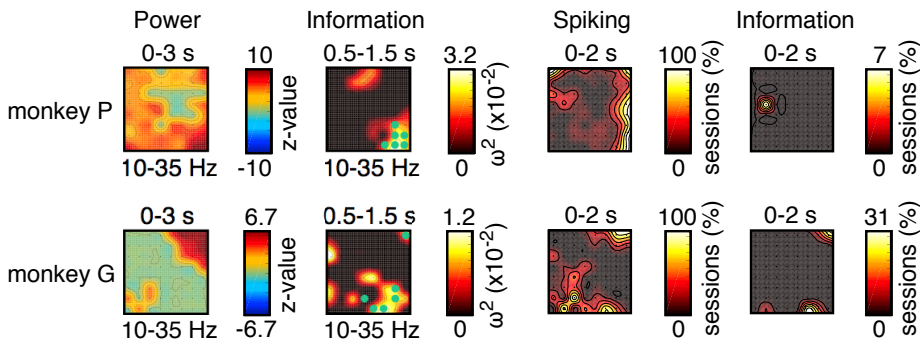

**B vIPFC**

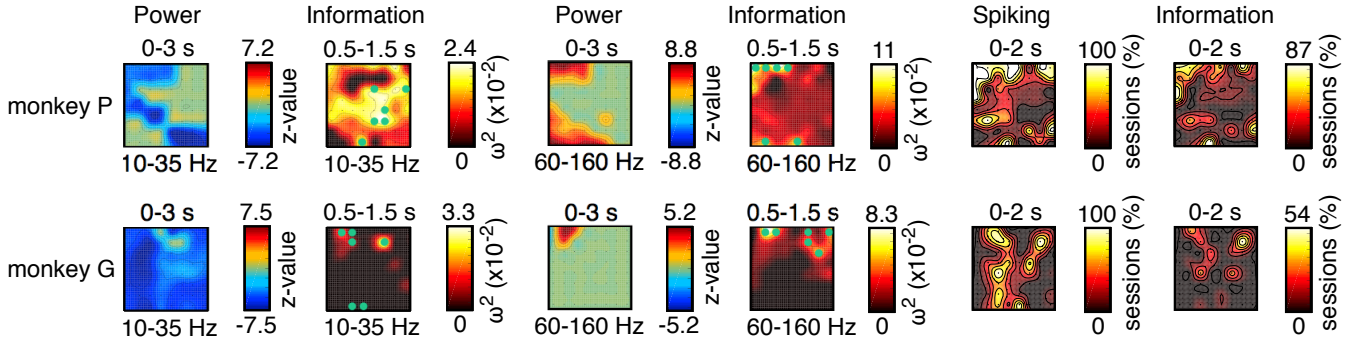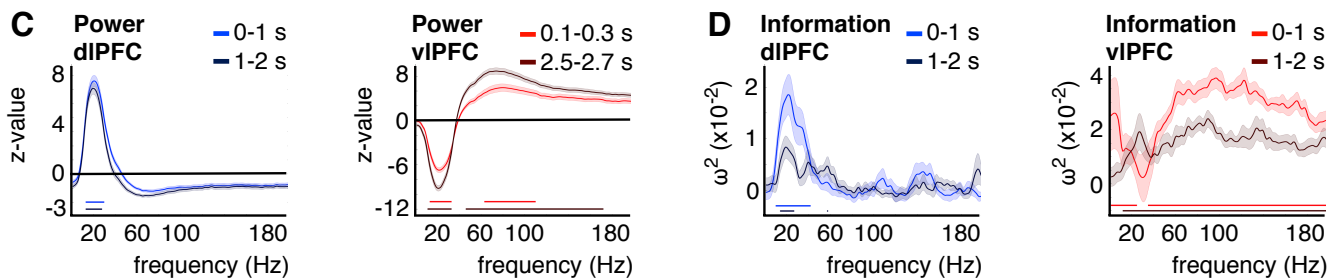

**Figure S1. LFP-power, spiking and category information**

(A) dIPFC-array topographies for beta power changes (z-value), for category information ( $\omega^2$ ) in beta power, for spiking (% recording days with spike rate / s > 1) and category information in spiking (% recording days with  $p < .001$ ). For monkey P (upper row), 80% channels showed a power increase, 25% channels showed category information in power, 20% channels recorded spikes and 0.2% channels / 0.5% MUA channels contained category information in spiking. For monkey G (lower row), 23% channels showed a power increase, 25% channels showed category information in power, 17% channels recorded spikes and 1% channels / 8% MUA channels contained category information in spiking. (B) vIPFC-array topographies for beta power changes (z-value), for category information ( $\omega^2$ ) in beta power, for gamma power changes (z-value), for category information ( $\omega^2$ ) in gamma power, for spiking (% recording days) and category information in spiking (% recording days). For monkey P (upper row), 42% channels showed a beta power decrease, 86% channels showed category information in beta power, 34% channels showed a gamma power increase, 95% channels showed category information in gamma power, 40% channels recorded spikes and 24% channels / 51% MUA channels contained category information in spiking. For monkey G (lower row), 95% channels showed a beta power decrease, 13% channels showed category information in beta power, 5% channels showed a gamma power increase, 47% channels showed category information in gamma power, 27% channels recorded spikes and 7.5% channels / 20% MUA channels contained category information in spiking. For (A, B), non-significant effects are masked (z-scores with  $p < .05$ , Bonferroni corrected;  $\omega^2$  with  $p < .001$ ; spike rate with spikes / s > 1). The green dots show the 6 channels (10%) with most category information in each frequency band and area, which were used as regions of interest for the distortion / spike-LFP coherence analyses. (C) Power change (z-value) relative to baseline as a function of frequency averaged over time intervals of interest (light, dark hue) and all channels in dIPFC (blue) and vIPFC (red). Shaded areas show  $\pm 1$  SE. Horizontal lines show significant frequency ranges ( $p < .05$ ,

Bonferroni corrected). **(D)** Category information ( $\omega^2$ ) in power as a function of frequency averaged over significant channels in dlPFC (blue) and vlPFC (red) separately for sample (0-1 s; light hue) and delay epochs (1-2 s; dark hue). Shaded areas show  $\pm 1$  SE. Horizontal lines show significant frequency ranges ( $p < .001$ ).

**Figure S2 (related to Figure 3)**

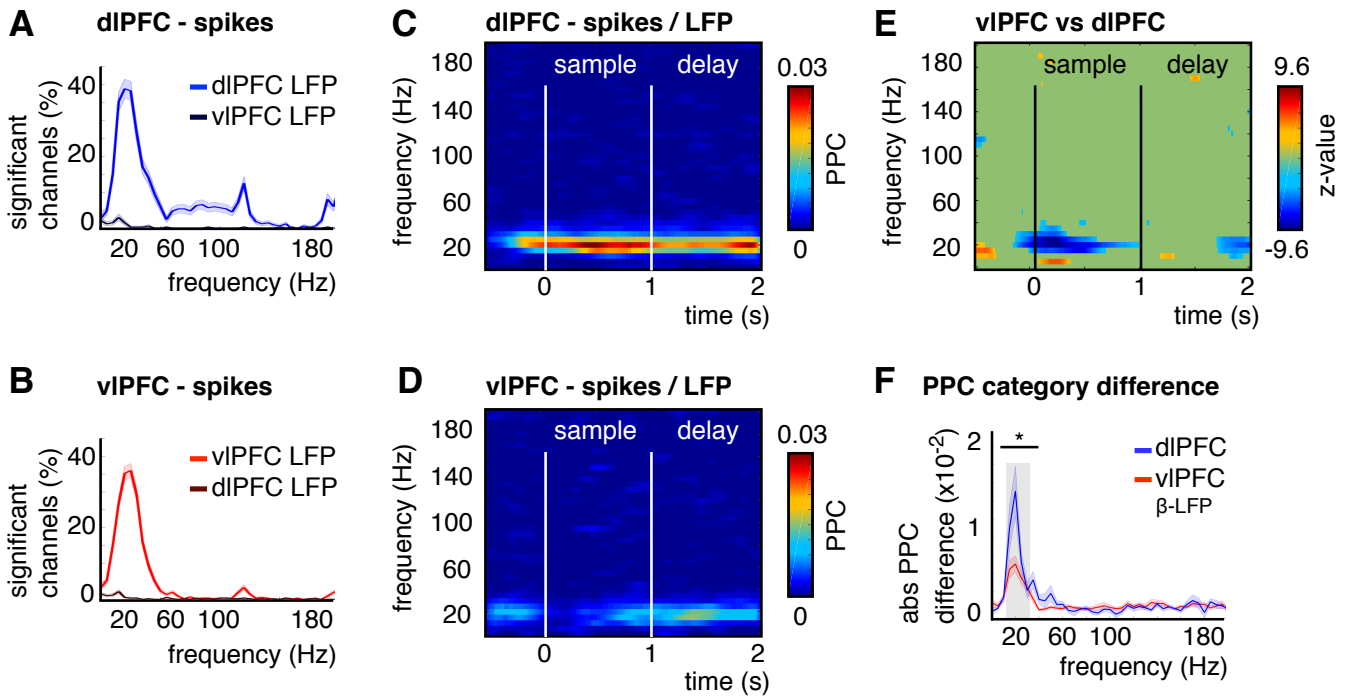

**Figure S2. Spike-LFP coherence**

(**A, B**) Spike-LFP phase coherence (% significant MUA channels, Rayleigh test  $p < .05$ , Bonferroni corrected) for spikes between 0-2 s after sample onset (averaged over all LFP channels except for the MUA channel) for dIPFC-spikes to dIPFC-LFP (light blue); dIPFC-spikes to vIPFC-LFP (dark blue, (**A**)) and vIPFC-spikes to vIPFC-LFP (light red); vIPFC-spikes to dIPFC-LFP (dark red (**B**)). Shaded areas show  $\pm 1$  SE. 64% dIPFC MUA channels showed significant spike-LFP coherence (over all frequencies between 1-200 Hz) for dIPFC-LFP, 10% dIPFC MUA channels for vIPFC-LFP, 60% vIPFC MUA channels for vIPFC-LFP, 10% vIPFC MUA channels for dIPFC-LFP. 32.5% dIPFC MUA channels showed significant spike-LFP coherence averaged over the beta band (10-35 Hz,  $p < .001$ ) for dIPFC-LFP, 0.3% dIPFC MUA channels for vIPFC-LFP, 27.5% vIPFC MUA channels for vIPFC-LFP, 0 vIPFC MUA channels for dIPFC-LFP. (**C, D**) Spike-LFP within-area coherence (pair-wise phase consistency (PPC)) as a function of time and frequency for dIPFC-spikes to dIPFC-LFP (**C**) and vIPFC-spikes to vIPFC-LFP (**D**) for all MUA channels with significant beta band coherence in each area. (**E**) Difference in spike-LFP within-area coherence (PPC) between vIPFC and dIPFC (Mann-Whitney U-test, z-value) as a function of time and frequency for all MUA channels with significant beta band coherence in each area. Non-significant z-values ( $p < .001$ ) are masked. (**F**) Absolute PPC difference between categories (for 0-2 s) over frequency averaged over all significant MUA channels in the beta band (gray area). The median absolute PPC difference from the category-shuffled permutation distributions was subtracted from the observed absolute PPC difference per MUA channel. Shaded areas show  $\pm 1$  SE. Asterisks indicate the significance level (with \*  $p < .05$ ). The PPC differences were calculated for the 10% most category-informative LFP electrodes for dIPFC / vIPFC-beta power (see Figure S1). For comparison, Figure 3F shows the data for the 10% most category-informative LFP electrodes for vIPFC-gamma power. For the vIPFC-beta LFP, 9.2% vIPFC MUA channels showed significant PPC differences between categories ( $p < .05$  permutation test, frequency-cluster corrected for 1-200 Hz). For beta PPC differences, there were 8.9% significant vIPFC MUA channels (vs. 5%,  $p < 4.3 \times 10^{-5}$ ).

**Figure S3 (related to Figure 4)**

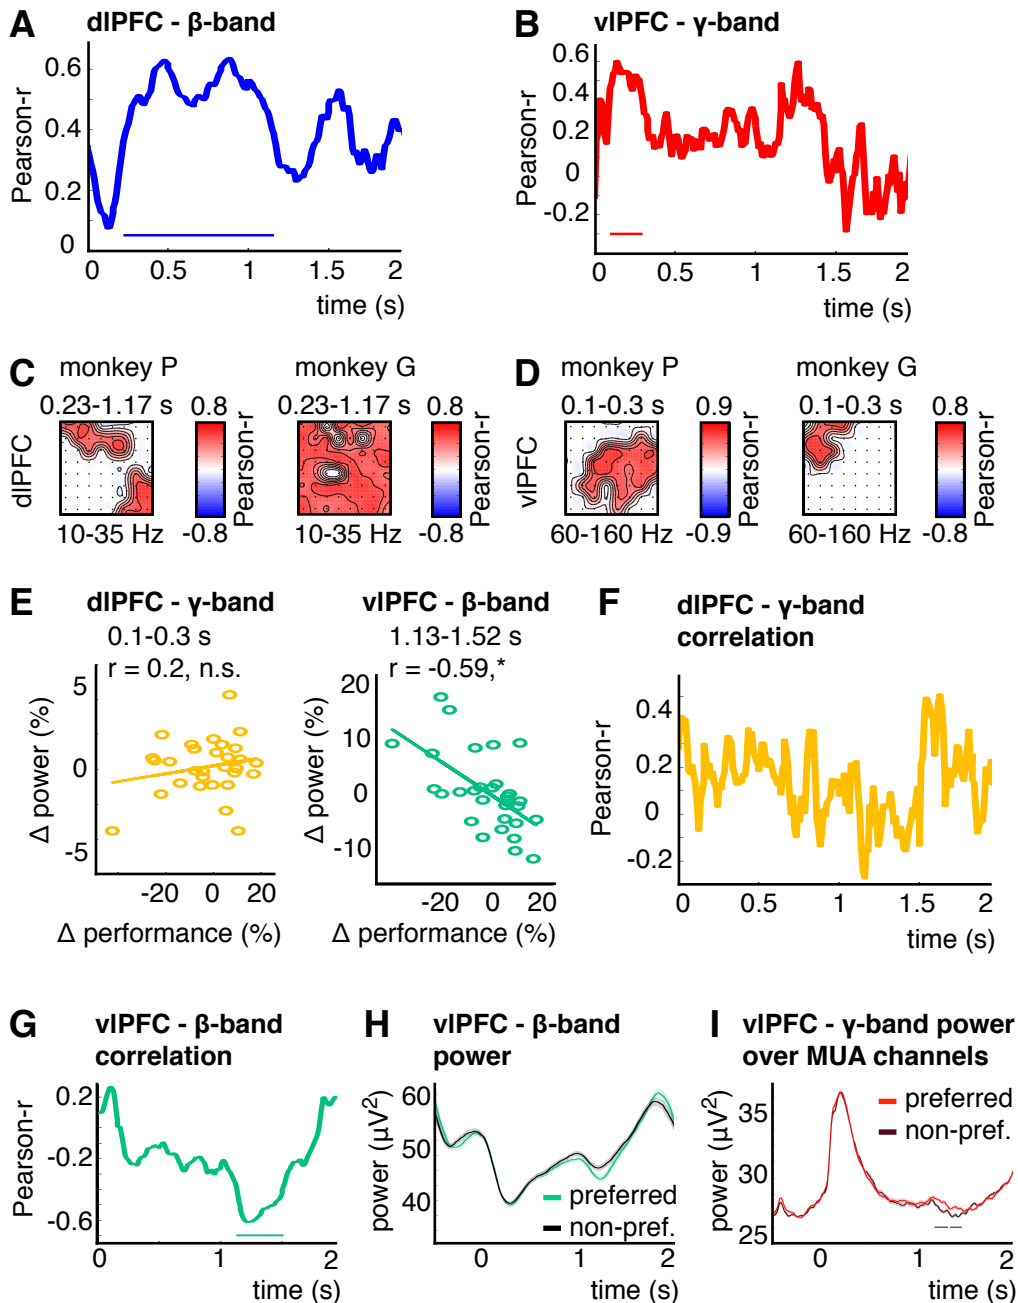

**Figure S3. Correlation between performance differences and power differences**

(A, B) Pearson-correlation coefficient ( $r$ ) over time between behavioral performance differences and power differences between categories averaged in the beta band (10-35 Hz) and all electrodes in dIPFC ((A), blue) and the gamma band (60-160 Hz) in vIPFC ((B), red). Horizontal lines show significant time intervals (time-cluster corrected; for dIPFC beta  $p < .002$  for 0.23-1.17 s; for vIPFC gamma  $p < .02$  for 0.1-0.3 s). (C, D) Array topographies for the correlation (Pearson- $r$ ) between performance differences and power differences between categories averaged over the beta band (10-35 Hz) in dIPFC (C) or the gamma band (60-160 Hz) in vIPFC (D) and over the time interval of interest (see (A, B)). Non-significant Pearson- $r$  coefficients are masked (dIPFC beta: 30% electrodes (two clusters) with  $p < .018$  and  $p < .028$  for monkey P; 92% electrodes with  $p < .002$  for monkey G; vIPFC gamma: 42% electrodes with  $p < .006$  for monkey P, 14% electrodes with  $p < .006$  for monkey G, channel-cluster corrected). (E) dIPFC-gamma power difference (yellow) and vIPFC-beta power difference (green) between categories plotted against performance difference between categories per session. Straight lines show the linear fit. Asterisks indicate the significance level (with n.s. = not significant, \*  $p < .05$ ). dIPFC-gamma power differences were averaged between 0.1-0.3 s, where we found a significant effect for vIPFC-gamma power (see (B)). vIPFC-beta power differences were averaged over the significant time interval shown in (G). (F, G) Pearson-correlation coefficient ( $r$ ) over time between behavioral performance difference and dIPFC-

gamma (yellow, **(F)**) and vIPFC-beta (green, **(G)**) power differences between categories (averaged over all electrodes per area). Horizontal lines show significant time intervals (time-cluster corrected; for vIPFC beta  $p < .016$  for 1.13-1.52 s). For dIPFC-gamma power (**F**), there was no significant correlation over time. **(H)** vIPFC-beta power for preferred / non-preferred categories (averaged over channels with a significant correlation). Shaded areas show  $\pm 1$  SE. **(I)** vIPFC-gamma power for preferred / non-preferred categories averaged over all channels that contained significant category information for spiking (242 MUA channels). Horizontal lines show significant time intervals ( $p < .028$  for 1.16-1.44 s, time-cluster corrected). For comparison: Figure 4F shows vIPFC-gamma power averaged for each recording day over electrodes with a significant correlation between power-performance differences (see **(D)**). Figure 4G shows the spike rate averaged over all electrodes that contained significant category information for spiking (like in **(I)**). Shaded areas show  $\pm 1$  SE with  $N = 242$  MUA channels in **(I)** and Figure 4G.  $N = 30$  recording days in Figure 4F.

**Figure S4 (related to Figures 5 and 6)**

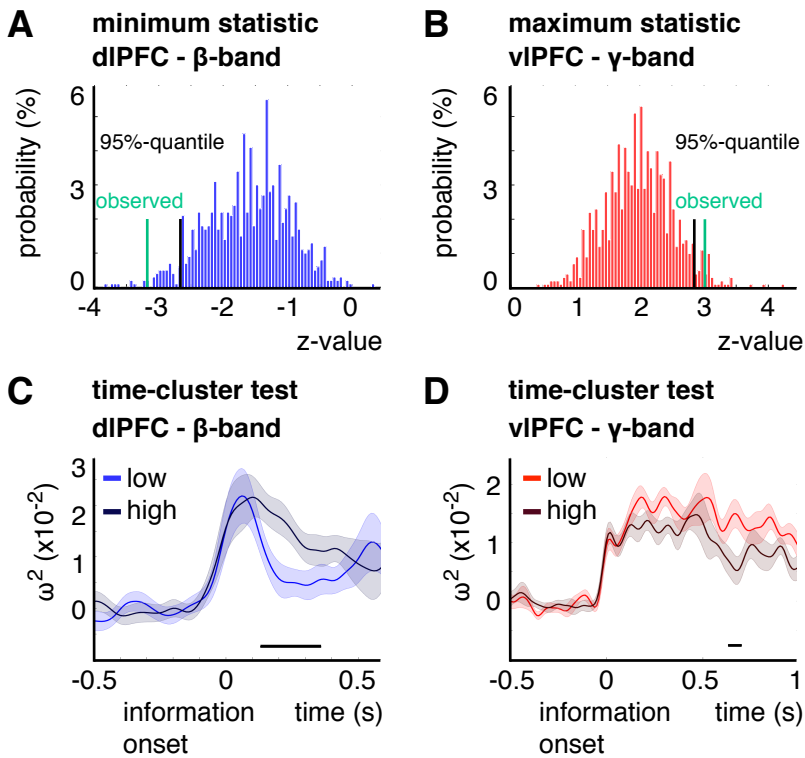

**Figure S4. Category information for different distortion levels per task epoch**

(A) Permutation distribution (Monte-Carlo approximation with 1000 runs) for the minimum / maximum statistic (Wilcoxon z-value) for the difference between low and high distortion with shuffled condition labels for category information in dIPFC-beta power during the delay ((A), blue) and vIPFC-gamma power during the sample epoch ((B), red). The black vertical line shows the 95%-quantile and the green vertical line shows the observed minimum / maximum statistic (dIPFC-beta at  $p < .01$ ; vIPFC-gamma at  $p < .027$ ). (C, D) Category information ( $\omega^2$ ) as a function of time for dIPFC-beta power ((C), blue) and vIPFC-gamma power ((D), red) for low (light hue) and high distortion (dark hue). The time courses were aligned to the first time point with significant category information per recording day ( $p < .05$  permutation test). In case there was no time point with  $p < .05$  (which happened in dIPFC-beta for 2 / 30 recording days), we aligned to the time point with maximal information. The alignment accounts for variability in the latency of category information due to different categories and exemplars on different recording days. For dIPFC-beta power, the first significant time point varied with a 0.375 s standard deviation (with  $mean = 0.532$  s). For vIPFC-gamma power, it varied with a 0.162 s standard deviation (with  $mean = 0.186$  s). We tested across all time points that were consistently available across all recording days from the first significant time point per day up to the test exemplar onset (sample and delay epoch). Horizontal lines show significant time intervals (dIPFC-beta  $p < .01$  for 0.13-0.36 s; vIPFC-gamma  $p < .038$  for 0.63-0.7 s, time-cluster corrected).
